# Supplementary figures and images for: RETRACTED ARTICLE: Quercetin-induced miR-200b-3p regulates the mode of self-renewing divisions in pancreatic cancer
Source: Springer Nature journal article supplement (doi:10.1186/s12943-017-0589-8), 2017-01-25

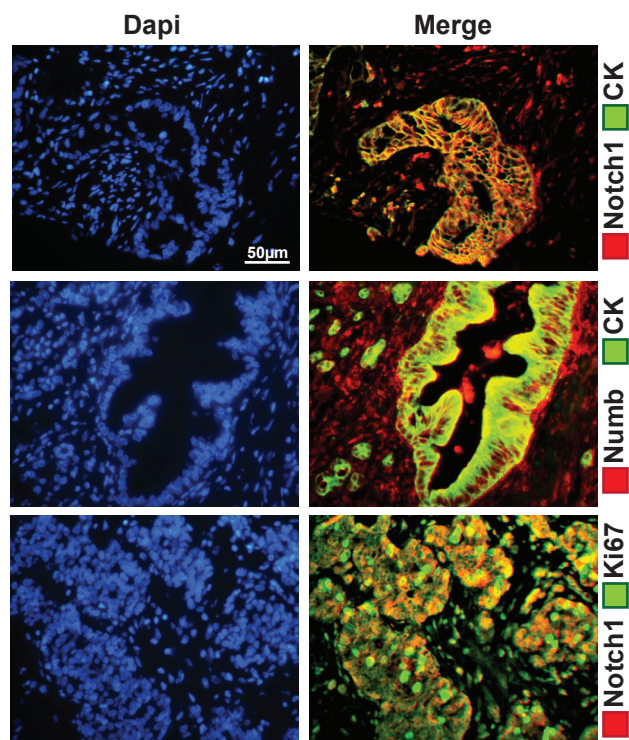

SFig1. Nwaeburu et al., 2016

Supplement: MOESM1 [file 12030054]

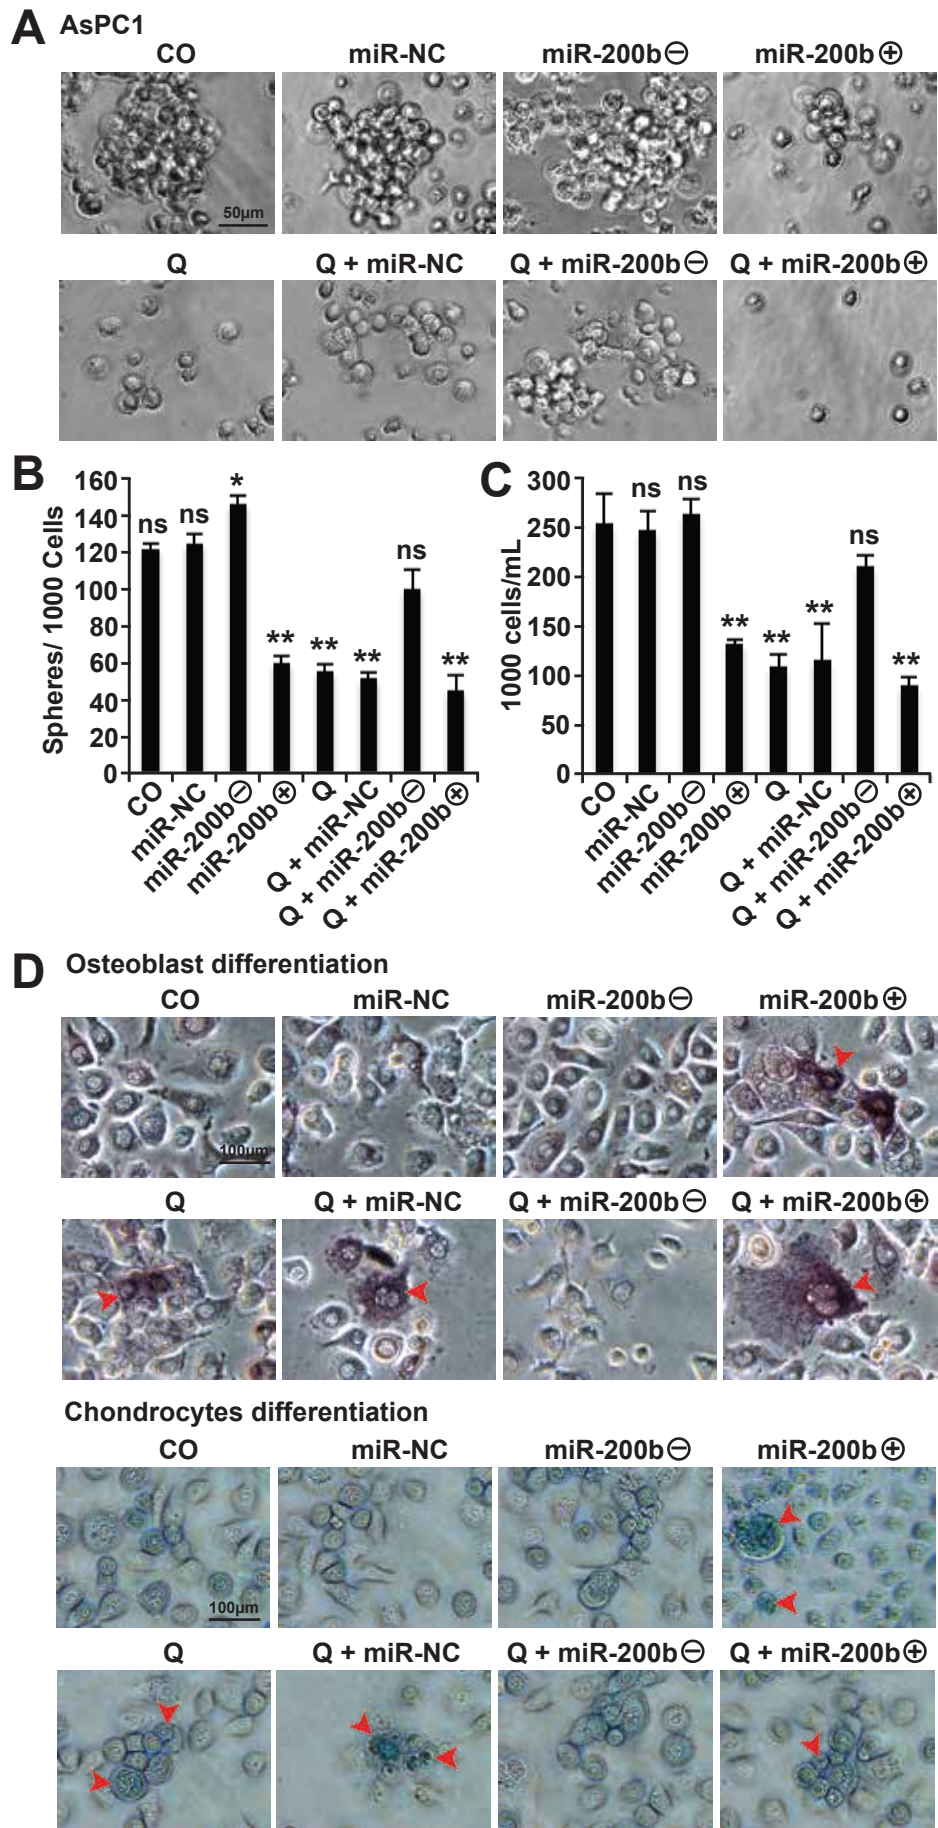

Supplement: MOESM4 [file 12030054]
